# Supplementary material for: Remote Sensing and Ecological Variables Related to Influenza A Prevalence and Subtype Diversity in Wild Birds in the Lluta Wetland of Northern Chile
Source: MDPI journal article supplement (doi:10.3390/v15061241), 2023-05-25
Supplement: s1 [file s1]

## Supplemental Material:

**Supplemental Table S1: Bivariable associations between IAV prevalence and explanatory variables**

| Variables                      | Categories           | Estimate  | p-value  | OR   | 95% CI       |
|--------------------------------|----------------------|-----------|----------|------|--------------|
| Abundance of wild birds        | Low (< 883)          | Reference |          |      |              |
|                                | High ( $\geq$ 883)   | 0.45      | 0.365    | 1.57 | (0.59-4.13)  |
| Species richness               | Low (< 29 sp)        | Reference |          |      |              |
|                                | High ( $\geq$ 29 sp) | 0.15      | 0.764    | 1.17 | (0.42-3.21)  |
| Abundance of migrants          | Low (< 113)          | Reference |          |      |              |
|                                | High ( $\geq$ 113)   | 0.8135    | 0.045**  | 2.26 | (1.04 -5.74) |
| NDVI                           | Low (< 0.27)         | Reference |          |      |              |
|                                | High ( $\geq$ 0.27)  | 1.23      | 0.0264** | 3.44 | (1.15- 8.24) |
| NDVI 1 month bs                | Low (< 0.27)         | Reference |          |      |              |
|                                | High ( $\geq$ 0.27)  | -0.3195   | 0.617    | 0.73 | (0.21-2.53)  |
| NDVI 2 month bs                | Low (< 0.27)         | Reference |          |      |              |
|                                | High ( $\geq$ 0.27)  | -0.1149   | 0.901    | 0.89 | (0.14- 5.41) |
| NDVI 3 month bs                | Low (< 0.27)         | Reference |          |      |              |
|                                | High ( $\geq$ 0.27)  | -0.6823   | 0.429    | 0.59 | (0.15- 3.21) |
| Water body size (km2)          | Low (< 0.014)        | Reference |          |      |              |
|                                | High ( $\geq$ 0.014) | 0.6600    | 0.31     | 1.93 | (0.54 -6.92) |
| Water body size 1 month bs     | Low (< 0.018)        | Reference |          |      |              |
|                                | High ( $\geq$ 0.018) | 0.8250    | 0.167    | 2.28 | (0.71 -7.35) |
| Water body size 2 month bs     | Low (< 0.016)        | Reference |          |      |              |
|                                | High ( $\geq$ 0.016) | 0.4756    | 0.607    | 1.61 | (0.26- 9.85) |
| Water body size 3 month bs     | Low (< 0.013)        | Reference |          |      |              |
|                                | High ( $\geq$ 0.013) | -0.2155   | 0.687    | 0.81 | (0.28- 2.29) |
| Maximum temperature (°C)       | Low (< 26)           | Reference |          |      |              |
|                                | High ( $\geq$ 26)    | -0.09148  | 0.859    | 0.92 | (0.33- 2.50) |
| Maximum temperature 1 month bs | Low (< 23)           | Reference |          |      |              |
|                                | High ( $\geq$ 23)    | -0.4908   | 0.323    | 1.14 | (0.42- 3.11) |
| Maximum temperature 2 month bs | Low (< 24)           | Reference |          |      |              |
|                                | High ( $\geq$ 24)    | 0.4483    | 0.37     | 1.56 | (0.58- 4.17) |
| Maximum temperature 3 month bs | Low (< 20)           | Reference |          |      |              |
|                                | High ( $\geq$ 20)    | 0.2514    | 0.623    | 1.29 | (0.47- 3.51) |
| Minimum temperature (°C)       | Low (< 13.5)         | Reference |          |      |              |
|                                | High ( $\geq$ 13.5)  | 0.4812    | 0.367    | 1.62 | (0.56 -4.59) |
| Minimum temperature 1 month bs | Low (< 14.2)         | Reference |          |      |              |
|                                | High ( $\geq$ 14.2)  | 0.1340    | 0.793    | 1.14 | (0.42 -3.11) |
| Minimum temperature 2 month bs | Low (< 13.4)         | Reference |          |      |              |

|                                |                      |           |       |      |              |
|--------------------------------|----------------------|-----------|-------|------|--------------|
|                                | High ( $\geq 13.4$ ) | -0.3620   | 0.474 | 0.69 | (0.26- 1.87) |
| Minimum temperature 3 month bs | Low ( $< 14.5$ )     | Reference |       |      |              |
|                                | High ( $\geq 14.5$ ) | 0.2011    | 0.695 | 1.28 | (0.47 -3.51) |
| Humidity (%)                   | Low ( $< 61.5$ )     | Reference |       |      |              |
|                                | High ( $\geq 61.5$ ) | -0.6116   | 0.224 | 0.54 | (0.203-1.45) |
| Humidity 1 month bs            | Low ( $< 61.9$ )     | Reference |       |      |              |
|                                | High ( $\geq 61.9$ ) | 0.2384    | 0.645 | 1.27 | (0.46-3.50)  |
| Humidity 2 month bs            | Low ( $< 62.7$ )     | Reference |       |      |              |
|                                | High ( $\geq 62.7$ ) | 0.1391    | 0.792 | 1.15 | (0.41-3.24)  |
| Humidity 3 month bs            | Low ( $< 62.7$ )     | Reference |       |      |              |
|                                | High ( $\geq 62.7$ ) | 0.1162    | 0.823 | 1.12 | (0.41-3.11)  |

**Supplemental Table S2: Sampling effort detail. Total number of samples collected in the study period, number of positive samples, samples inoculated in eggs and successfully sequenced.**

| Number of samples collected | Number of samples positive for M gene (Ct<38) | Number of samples inoculated in eggs (Ct<35) | Number of isolates | Number of completely sequenced isolates |
|-----------------------------|-----------------------------------------------|----------------------------------------------|--------------------|-----------------------------------------|
| 4349                        | 90                                            | 35                                           | 16                 | 10                                      |

**Supplemental Table S3. Species identified in the Lluta River wetland between September 2015 and October 2020.**

| Family / Bird species                  | Commun Name           | Maximum count on site | Residency Status |
|----------------------------------------|-----------------------|-----------------------|------------------|
| <b>Anatidae</b>                        |                       |                       |                  |
| <i>Spatula cyanoptera</i>              | Cinnamon teal         | 36                    | R                |
| <i>Anas bahamensis</i>                 | White-cheeked pintail | 40                    | R                |
| <i>Anas georgica spinicauda</i>        | Yellow-billed Pintail | 2                     | R                |
| <i>Spatula discors</i>                 | Blue-winged teal      | 1                     | A (M)            |
| <i>Oxyura jamaicensis</i>              | Andean duck           | 1                     | A                |
| <b>Charadriidae</b>                    |                       |                       |                  |
| <i>Pluvialis dominica</i>              | Golden plover         | 25                    | M                |
| <i>Charadrius nivosus</i>              | Snowy plover          | 2                     | R                |
| <i>Charadrius semipalmatus</i>         | Semipalmated Plover   | 30                    | M                |
| <i>Charadrius vociferus peruvianus</i> | Killdeer              | 10                    | R                |

|                                       |                            |      |       |
|---------------------------------------|----------------------------|------|-------|
| <i>Pluvialis squatarola</i>           | Grey Plover                | 8    | M     |
| <b>Laridae</b>                        |                            |      |       |
| <i>Chroicocephalus serranus</i>       | Andean gull                | 350  | R     |
| <i>Chroicocephalus maculipennis</i>   | Brown-hooded gull          | 300  | R     |
| <i>Leucophaeus pipixcan</i>           | Franklin gull              | 2300 | M     |
| <i>Larus dominicanus</i>              | Kelp gull                  | 300  | R     |
| <i>Larus belcheri</i>                 | Belcher's Gull             | 60   | R     |
| <i>Leucophaeus modestus</i>           | Grey gull                  | 3000 | R     |
| <i>Thalasseus elegans</i>             | Elegant tern               | 90   | M     |
| <i>Larosterna inca</i>                | Inca Tern                  | 25   | R     |
| <i>Sterna hirundinacea</i>            | South American tern        | 3    | R     |
| <i>Sternula antillarum</i>            | Least Tern                 | 1    | A (M) |
| <i>Rynchops niger cinerascens</i>     | Black Skimmer              | 66   | M     |
| <b>Scolopacidae</b>                   |                            |      |       |
| <i>Calidris canutus</i>               | Red Knot                   | 1    | M     |
| <i>Calidris alba</i>                  | Sanderling                 | 700  | M     |
| <i>Calidris bairdii</i>               | Baird's sandpiper          | 8    | M     |
| <i>Arenaria interpres</i>             | Ruddy turnstone            | 8    | M     |
| <i>Calidris pusilla</i>               | Semipalmated Sandpiper     | 6    | M     |
| <i>Calidris himantopus</i>            | Stilt Sandpiper            | 15   | M     |
| <i>Calidris minutilla</i>             | Least sandpiper            | 2    | M     |
| <i>Tringa semipalmata</i>             | Willet                     | 19   | M     |
| <i>Actitis macularius</i>             | Spotted sandpiper          | 5    | M     |
| <i>Calidris melanotos</i>             | Pectoral sandpiper         | 2    | M     |
| <i>Phalaropus tricolor</i>            | Wilson's Phalarope         | 8    | M     |
| <i>Numenius phaeopus</i>              | Whimbrel                   | 500  | M     |
| <i>Limosa haemastica</i>              | Hudsonian Godwit           | 16   | M     |
| <i>Tringa flavipes</i>                | Lesser Yellowlegs          | 10   | M     |
| <i>Tringa melanoleuca</i>             | Greater Yellowlegs         | 50   | M     |
| <b>Haematopodidae</b>                 |                            |      |       |
| <i>Haematopus palliatus palliatus</i> | American oystercatcher     | 123  | R     |
| <i>Haematopus ater</i>                | Blackish oystercatcher     | 18   | R     |
| <b>Ardeidae</b>                       |                            |      |       |
| <i>Egretta caerulea</i>               | Little Blue Heron          | 8    | R     |
| <i>Bubulcus ibis ibis</i>             | Cattle Egret               | 1    | R     |
| <i>Egretta thula thula</i>            | Snowy egret                | 30   | R     |
| <i>Ardea alba egretta</i>             | Great egret                | 30   | R     |
| <i>Egretta tricolor</i>               | Tricolored Heron           | 1    | A     |
| <i>Nycticorax nycticorax</i>          | Black-crowned Night-Heron  | 84   | R     |
| <i>Nyctanassa violacea</i>            | Yellow-crowned Night-Heron | 1    | A     |
| <b>Rallidae</b>                       |                            |      |       |
| <i>Fulica leucoptera</i>              | White-winged Coot          | 1    | R     |

|                                              |                           |    |   |
|----------------------------------------------|---------------------------|----|---|
| <i>Fulica ardesiaca</i>                      | Slate-colored Coot        | 20 | A |
| <i>Gallinula galeata</i>                     | Common Gallinule          | 32 | R |
| <b>Pelecanidae</b>                           |                           |    |   |
| <i>Pelecanus thagus</i>                      | Peruvian Pelican          | 60 | R |
| <i>Sula variegata</i>                        | Peruvian Booby            | 20 | R |
| <b>Threskiornithidae</b>                     |                           |    |   |
| <i>Plegadis chihi</i>                        | White-faced Ibi           | 3  | R |
| <i>Platalea ajaja</i>                        | Roseate Spoonbill         | 1  | A |
| <i>Plegadis ridgwayi</i>                     | Puna Ibis                 | 4  | A |
| <b>Phalacrocoracidae</b>                     |                           |    |   |
| <i>Phalacrocorax brasilianus brasilianus</i> | Neotropic Cormorant       | 42 | R |
| <b>Falconidae</b>                            |                           |    |   |
| <i>Falco sparverius</i>                      | American Kestrel          | 2  | R |
| <i>Falco peregrinus</i>                      | Peregrine falcon          | 1  | R |
| <b>Tyrannidae</b>                            |                           |    |   |
| <i>Lessonia oreas</i>                        | Andean Negrito            | 2  | R |
| <i>Lessonia rufa</i>                         | Austral Negrito           | 2  | R |
| <i>Muscisaxicola maculirostris</i>           | Spot-billed ground tyrant | 1  | R |
| <i>Muscisaxicola maclovianus</i>             | Dark-faced ground tyrant  | 1  | R |
| <b>Troglodytidae</b>                         |                           |    |   |
| <i>Troglodytes aedon</i>                     | House wren                | 5  | R |
| <b>Emberizidae</b>                           |                           |    |   |
| <i>Zonotrichia capensis</i>                  | Rufous-collared Sparrow   | 26 | R |
| <b>Cathartidae</b>                           |                           |    |   |
| <i>Cathartes aura jota</i>                   | Turkey Vulture            | 94 | R |
| <b>Icteridae</b>                             |                           |    |   |
| <i>Leistes bellicosus</i>                    | Peruvian meadowlark       | 8  | R |
| <i>Molothrus bonariensis</i>                 | Shiny Cowbird             | 4  | R |
| <b>Columbidae</b>                            |                           |    |   |
| <i>Columbina cruziana</i>                    | Croaking Ground-Dove      | 4  | R |
| <i>Zenaida meloda</i>                        | West Peruvian Dove        | 23 | R |
| <i>Zenaida auriculata</i>                    | Eared Dove                | 2  | R |
| <b>Thraupidae</b>                            |                           |    |   |
| <i>Conirostrum cinereum</i>                  | Cinereous Conebill        | 17 | R |
| <i>Xenospingus concolor</i>                  | Slender-billed finch      | 31 | R |
| <b>Phoenicopteridae</b>                      |                           |    |   |
| <i>Phoenicopus chilensis</i>                 | Chilean Flamingo          | 2  | A |

**Residency Status: R: Resident, M: Migratory, A: Accidental**

**Supplemental Table S4: Ranges of meteorological and landscape variables during the sampling months**

| <b>Variables</b>             | <b>Min</b> | <b>Max</b> | <b>Median</b> |
|------------------------------|------------|------------|---------------|
| <b>Min. Temp (C°)</b>        | 9          | 18         | 14            |
| <b>Max. Temp(C°)</b>         | 20         | 30         | 26            |
| <b>Rainfall (mm)</b>         | 0          | 3          | 0.37          |
| <b>Humidity (%)</b>          | 55.7       | 68.30      | 61.50         |
| <b>NDVI</b>                  | 0.18       | 0.31       | 0.27          |
| <b>Water body size (km2)</b> | 0.0045     | 0.0333     | 0.014         |
